# Supplementary material
Source: Research Square preprint supplement (doi:10.21203/rs.3.rs-9661662/v1)
Supplement: Supplementary file 1 [file 7ee2cbd84a2f44fff787a0be.docx]

**Forest water-use strategies at high-latitude and -altitude regions over the last Millennium**

**Running title:** MILLENNIAL FOREST WATER-USE

Olga V. Churakova (Sidorova)1,2, Mikhail Zharkov2, Rolf Siegwolf1, Matthias Saurer1

1Swiss Federal Institute for Forest, Snow and Landscape Research WSL, Switzerland

2Siberian Federal University, Krasnoyarsk, Russian Federation

Contact information: Olga Churakova [olga.churakova@wsl.ch](mailto:olga.churakova@wsl.ch); ORCID https://orcid.org/0000-0002-1687-1201

**Supplementary material**

**Figure S1.** Smoothed by a 11-year reconstructed and measured CO2 and other greenhouse gas emissions (CH4 and N2O); data from ice cores (MacFarling et al., 2006; Lan 2025; Belmecheri and Lavergne, 2020).

**a) b)**

**c) d)**

**e) f)**

**g) h)**

**i) j)**

**k) l)**

**Figure S2.** Reconstructed millennial iWUE (**left panel**) and the ratio of intercellular to ambient CO2 changes (ci/ca) (**right panel**) for northeastern Yakutia (YAK) (**a, b**), eastern Taimyr (TAY) (**c, d**), Quebec Taiga (Canada, CAN) (**e, f**), Laanila, Finland (FIN) (i, j), and Torneträsk (Sweden, SWE) (**g, h**), Forfjerd (northwest Norway, NOR) (**k, l**).

**a) b)**

**c) d)**

**e) f)**

**Figure S3.** Reconstructed millennial iWUE (**left panel**) and the ratio of intercellular to ambient CO2 changes (ci/ca) (**right panel**) for the high-elevated Mongun-Taiga, Altai (ALT, **a-b**); Karakorum, Moor, Pakistan (PAK, **c-d**) and Loetschental, the Swiss Alps (LOT **e-f**).

**Table S1.** Averaged summer June-July-August (JJA) air temperature (Temp), precipitation (Prec), evapotranspiration (Evp) and vapor pressure deficit (VPD) computed based on gridded CRU TS4.08 data. Data is available at https://climexp.knmi.nl for the period 1901-2024 (assessed April 2026).*Precipitation data were calculated from the local weather stations for YAK and TAY sites for the period 1950 to 2024 (assessed April 2026). NP – no permafrost available.

| **Site code** | **Weather station, code** | **Weather station coordinates** | **Summer**  **temperature,**  **(Temp), °C** | ***Summer**  **precipitation**  **(Prec), mm** | **Evapotranspiration (Evp), mm** | **VPD, hPA** | **Permafrost thaw depth, cm** |
| --- | --- | --- | --- | --- | --- | --- | --- |
| 1. **High latitudes (HL)** | | | | | | |  |
| **YAK** | Chokurdakh | 70° N, 147° E,  11 m asl | 6.8 | 34.8 | 2.31 | 0.26 | 40-70 |
| **TAY** | Khatanga | 71° N, 102° E,  33 m asl | 10.6 | 45.8 | 2.60 | 0.34 | 70-80 |
| **CAN** | Mackenzie Delta | 65**°**-70**°** N  130**°**-140**°** W | 11.6 | 41.5 | 3.03 | 0.60 | 120 |
| **FIN** | Laanila, Ivalo  1960-2002 | 68°N, 26° E  179 m asl | 11.4 | 183.5 | 2.70 | 0.49 | NP |
| **SWE** | Torneträsk | 68**°** N19**°**-E | 7.2 | 215.2 | 2.15 | 0.37 | NP |
| **NOR** | Forfjord | 65**°**-70**°**N  10**°**-20**°**E  63–63.5° N 13.5°–14° E | 11.4 | 228.1 | 2.70 | 0.51 | NP |
| **(b) High altitudes (HA)** | | | | | | |  |
| **ALT** | Mugur- Aksy | 45**°**-50**°**N  85**°**-90**°**E | 10.0 | 174.0 | 3.45 | 0.61 | 40-90 |
| **PAK** | Astor  Gilgit  Srinagar | 36**°** N, 74**°** E  2166 m asl  1460 m asl  1587 m asl | 11.9 | 61.3 | 3.92 | 0.76 | NP |
| **LOT** | Loetschental | 40**°**-50**°**N  40**°**-50**°** E | 10.6 | 464.9 | 2.87 | 0.36 | NP |

**Table S2.** Correlation matrix between high-altitude sites (HL) over the period from CE 1000 to 1989 in 100-years steps. Significant correlations (*P<0.01*) are marked in a red color. NA – not available.

| **Period** | **Site** | **SWE** | **NOR** | **CAN** | **YAK** | **TAY** | **FIN** |
| --- | --- | --- | --- | --- | --- | --- | --- |
| 1000-1000 | SWE | 1.00 | 0.30 | 0.04 | 0.16 | -0.03 | NA |
|  | NOR | 0.30 | 1.00 | -0.04 | -0.18 | 0.13 | NA |
|  | CAN | 0.04 | -0.04 | 1.00 | -0.27 | 0.13 | NA |
|  | YAK | 0.16 | -0.18 | -0.27 | 1.00 | 0.11 | NA |
|  | TAY | -0.03 | 0.13 | 0.13 | 0.11 | 1.00 | NA |
|  |  |  |  |  |  |  |  |
| 1101-1200 | SWE | 1.00 | 0.28 | -0.06 | 0.03 | 0.01 | NA |
|  | NOR | 0.28 | 1.00 | 0.05 | 0.01 | -0.08 | NA |
|  | CAN | -0.06 | 0.05 | 1.00 | 0.12 | 0.03 | NA |
|  | YAK | 0.03 | 0.01 | 0.12 | 1.00 | -0.11 | NA |
|  | TAY | 0.01 | -0.08 | 0.03 | -0.11 | 1.00 | NA |
|  |  |  |  |  |  |  |  |
| 1201-1300 | SWE | 1.00 | 0.32 | 0.07 | -0.02 | -0.06 | NA |
|  | NOR | 0.32 | 1.00 | -0.23 | 0.05 | 0.05 | NA |
|  | CAN | 0.07 | -0.23 | 1.00 | -0.07 | 0.11 | NA |
|  | YAK | -0.02 | 0.05 | -0.07 | 1.00 | -0.08 | NA |
|  | TAY | -0.06 | 0.05 | 0.11 | -0.08 | 1.00 | NA |
|  |  |  |  |  |  |  |  |
| 1301-1400 | SWE | 1.00 | 0.74 | 0.01 | -0.02 | -0.09 | NA |
|  | NOR | 0.74 | 1.00 | -0.04 | 0.08 | 0.02 | NA |
|  | CAN | 0.01 | -0.04 | 1.00 | -0.12 | 0.19 | NA |
|  | YAK | -0.02 | 0.08 | -0.12 | 1.00 | 0.03 | NA |
|  | TAY | -0.09 | 0.02 | 0.19 | 0.03 | 1.00 | NA |
|  |  |  |  |  |  |  |  |
| 1401-1500 | SWE | 1.00 | 0.36 | -0.13 | 0.12 | 0.03 | NA |
|  | NOR | 0.36 | 1.00 | -0.08 | -0.11 | -0.20 | NA |
|  | CAN | -0.13 | -0.08 | 1.00 | 0.06 | -0.21 | NA |
|  | YAK | 0.12 | -0.11 | 0.06 | 1.00 | -0.01 | NA |
|  | TAY | 0.03 | -0.20 | -0.21 | -0.01 | 1.00 | NA |
|  |  |  |  |  |  |  |  |
| 1501-1600 | SWE | 1.00 | 0.49 | -0.02 | -0.01 | 0.01 | NA |
|  | NOR | 0.49 | 1.00 | 0.13 | -0.02 | -0.14 | NA |
|  | CAN | -0.02 | 0.13 | 1.00 | 0.16 | -0.21 | NA |
|  | YAK | -0.01 | -0.02 | 0.16 | 1.00 | -0.01 | NA |
|  | TAY | 0.01 | -0.14 | -0.21 | -0.01 | 1.00 | NA |
|  |  |  |  |  |  |  |  |
| 1601-1700 | SWE | 1.00 | 0.46 | -0.16 | -0.15 | 0.15 | 0.56 |
|  | NOR | 0.46 | 1.00 | -0.10 | 0.07 | 0.22 | 0.54 |
|  | CAN | -0.16 | -0.10 | 1.00 | 0.45 | -0.69 | 0.22 |
|  | YAK | -0.15 | 0.07 | 0.45 | 1.00 | -0.54 | 0.25 |
|  | TAY | 0.15 | 0.22 | -0.69 | -0.54 | 1.00 | -0.16 |
|  | FIN | 0.56 | 0.54 | 0.22 | 0.25 | -0.16 | 1.00 |
|  |  |  |  |  |  |  |  |
| 1701-1800 | SWE | 1.00 | 0.51 | -0.20 | -0.11 | -0.01 | 0.58 |
|  | NOR | 0.51 | 1.00 | -0.01 | -0.06 | 0.04 | 0.56 |
|  | CAN | -0.20 | -0.01 | 1.00 | -0.06 | 0.02 | 0.12 |
|  | YAK | -0.11 | -0.06 | -0.06 | 1.00 | 0.09 | -0.12 |
|  | TAY | -0.01 | 0.04 | 0.02 | 0.09 | 1.00 | -0.09 |
|  | FIN | 0.58 | 0.56 | 0.12 | -0.12 | -0.09 | 1.00 |
|  |  |  |  |  |  |  |  |
| 1801-1900 | SWE | 1.00 | 0.65 | 0.06 | 0.40 | 0.34 | 0.66 |
|  | NOR | 0.65 | 1.00 | 0.08 | 0.34 | 0.31 | 0.58 |
|  | CAN | 0.06 | 0.08 | 1.00 | 0.19 | 0.24 | 0.06 |
|  | YAK | 0.40 | 0.34 | 0.19 | 1.00 | 0.49 | 0.26 |
|  | TAY | 0.34 | 0.31 | 0.24 | 0.49 | 1.00 | 0.42 |
|  | FIN | 0.66 | 0.58 | 0.06 | 0.26 | 0.42 | 1.00 |
|  |  |  |  |  |  |  |  |
| 1901-1989 | SWE | 1.00 | 0.85 | 0.88 | 0.75 | 0.75 | 0.91 |
|  | NOR | 0.85 | 1.00 | 0.78 | 0.64 | 0.68 | 0.74 |
|  | CAN | 0.88 | 0.78 | 1.00 | 0.86 | 0.85 | 0.82 |
|  | YAK | 0.75 | 0.64 | 0.86 | 1.00 | 0.69 | 0.72 |
|  | TAY | 0.75 | 0.68 | 0.85 | 0.69 | 1.00 | 0.73 |
|  | FIN | 0.91 | 0.74 | 0.82 | 0.72 | 0.73 | 1.00 |

**Table S3** Correlation matrix between high-altitude sites (HA) over the period from CE 1000 to 1989 in 100-years steps. Significant correlations (*P<0.01*) are marked in a red color.

| **Period** | **Site** | **ALT** | **LOT** | **PAK** |
| --- | --- | --- | --- | --- |
| 1000-1989 | ALT | 1.00 | 0.72 | 0.72 |
|  | LOT | 0.72 | 1.00 | 0.73 |
|  | PAK | 0.72 | 0.73 | 1.00 |
|  |  |  |  |  |
| 1000-1100 | ALT | 1.00 | 0.17 | -0.16 |
|  | LOT | 0.17 | 1.00 | -0.04 |
|  | PAK | -0.16 | -0.04 | 1.00 |
|  |  |  |  |  |
| 1101-1200 | ALT | 1.00 | -0.02 | -0.21 |
|  | LOT | -0.02 | 1.00 | -0.04 |
|  | PAK | -0.21 | -0.04 | 1.00 |
|  |  |  |  |  |
| 1201-1300 | ALT | 1.00 | -0.08 | 0.15 |
|  | LOT | -0.08 | 1.00 | -0.13 |
|  | PAK | 0.15 | -0.13 | 1.00 |
|  |  |  |  |  |
| 1301-1400 | ALT | 1.00 | 0.18 | -0.06 |
|  | LOT | 0.18 | 1.00 | 0.22 |
|  | PAK | -0.06 | 0.22 | 1.00 |
|  |  |  |  |  |
| 1401-1500 | ALT | 1.00 | 0.03 | 0.02 |
|  | LOT | 0.03 | 1.00 | -0.10 |
|  | PAK | 0.02 | -0.10 | 1.00 |
|  |  |  |  |  |
| 1501-1600 | ALT | 1.00 | 0.24 | 0.08 |
|  | LOT | 0.24 | 1.00 | -0.07 |
|  | PAK | 0.08 | -0.07 | 1.00 |
|  |  |  |  |  |
| 1601-1700 | ALT | 1.00 | 0.22 | 0.07 |
|  | LOT | 0.22 | 1.00 | -0.02 |
|  | PAK | 0.07 | -0.02 | 1.00 |
|  |  |  |  |  |
| 1701-1800 | ALT | 1.00 | 0.19 | 0.00 |
|  | LOT | 0.19 | 1.00 | -0.25 |
|  | PAK | 0.00 | -0.25 | 1.00 |
|  |  |  |  |  |
| 1801-1900 | ALT | 1.00 | 0.10 | 0.21 |
|  | LOT | 0.10 | 1.00 | 0.26 |
|  | PAK | 0.21 | 0.26 | 1.00 |
|  |  |  |  |  |
| 1901-1989 | ALT | 1.00 | 0.85 | 0.87 |
|  | LOT | 0.85 | 1.00 | 0.87 |
|  | PAK | 0.87 | 0.87 | 1.00 |

**Table S4.** Pearson correlation coefficients between study sites and monthly climate variables from January to December (1-12 months) for cloud cover (a), potential evapotranspiration (b), precipitation, (c), air temperature (d), relative humidity (e) and vapor pressure deficit (f) computed for all study sites. Significant (*P<0.01*)positive values are marked in red; negative values are marked in blue. NA- data is not available.

1. **Cloud cover**

|  | **CAN** | **YAK** | **TAY** | **FIN** | **SWE** | **NOR** | **ALT** | **LOT** | **PAK** |
| --- | --- | --- | --- | --- | --- | --- | --- | --- | --- |
| **1** | -0.11 (p=0.71) | -0.12 (p=0.40) | -0.14 (p=0.52) | -0.20 (p=0.27) | 0.01 (p=0.93) | -0.09 (p=0.65) | -0.22 (p=0.14) | 0.01 (p=0.95) | 0.44 (p<10⁻³) |
| **2** | -0.53 (p<10⁻⁴) | 0.24 (p=0.09) | -0.33 (p=0.04) | -0.15 (p=0.41) | -0.25 (p=0.13) | -0.29 (p=0.12) | -0.12 (p=0.44) | -0.14 (p=0.14) | 0.14 (p=0.48) |
| **3** | 0.34 (p<10⁻⁴) | -0.12 (p=0.24) | -0.25 (p=0.08) | 0.16 (p=0.10) | 0.01 (p=0.95) | 0.35 (p<10⁻⁴) | 0.05 (p=0.75) | 0.09 (p=0.37) | -0.12 (p=0.54) |
| **4** | -0.04 (p=0.80) | -0.01 (p=0.90) | 0.04 (p=0.77) | 0.07 (p=0.50) | -0.20 (p=0.05) | 0.13 (p=0.22) | 0.35 (p=0.02) | 0.02 (p=0.80) | 0.08 (p=0.70) |
| **5** | 0.04 (p=0.66) | 0.07 (p=0.49) | -0.23 (p=0.11) | -0.02 (p=0.83) | -0.09 (p=0.39) | 0.10 (p=0.34) | -0.03 (p=0.73) | -0.07 (p=0.45) | -0.14 (p=0.47) |
| **6** | -0.29 (p<10⁻³) | 0.16 (p=0.12) | 0.04 (p=0.79) | -0.08 (p=0.40) | -0.12 (p=0.22) | 0.29 (p<10⁻³) | 0.18 (p=0.24) | -0.06 (p=0.55) | 0.13 (p=0.50) |
| **7** | 0.13 (p=0.18) | -0.05 (p=0.64) | -0.08 (p=0.58) | -0.41 (p<10⁻⁵) | -0.46 (p<10⁻⁶) | 0.22 (p=0.04) | -0.20 (p=0.18) | -0.46 (p<10⁻⁷) | 0.26 (p=0.18) |
| **8** | -0.03 (p=0.74) | 0.00 (p=0.97) | -0.09 (p=0.37) | -0.45 (p<10⁻⁶) | -0.20 (p=0.05) | 0.25 (p=0.02) | -0.17 (p=0.12) | -0.60 (p<10⁻¹¹) | 0.10 (p=0.36) |
| **9** | -0.07 (p=0.51) | -0.05 (p=0.62) | 0.07 (p=0.50) | -0.06 (p=0.55) | -0.05 (p=0.63) | 0.04 (p=0.70) | 0.09 (p=0.39) | -0.09 (p=0.38) | 0.07 (p=0.52) |
| **10** | 0.22 (p=0.02) | -0.11 (p=0.27) | 0.05 (p=0.66) | 0.04 (p=0.72) | -0.05 (p=0.61) | 0.09 (p=0.44) | 0.12 (p=0.24) | 0.09 (p=0.34) | -0.08 (p=0.53) |
| **11** | 0.17 (p=0.25) | 0.06 (p=0.70) | -0.10 (p=0.59) | 0.01 (p=0.89) | -0.11 (p=0.26) | -0.13 (p=0.21) | 0.20 (p=0.04) | -0.01 (p=0.96) | -0.12 (p=0.55) |
| **12** | -0.12 (p=0.33) | 0.15 (p=0.29) | NA | -0.02 (p=0.86) | 0.05 (p=0.60) | -0.09 (p=0.64) | 0.15 (p=0.17) | -0.20 (p=0.05) | 0.22 (p=0.27) |

1. **Evapotranspiration**

|  | **CAN** | **YAK** | **TAY** | **FIN** | **SWE** | **NOR** | **ALT** | **LOT** | **PAK** |
| --- | --- | --- | --- | --- | --- | --- | --- | --- | --- |
| **1** | -0.24 (p=0.23) | NA | NA | -0.01 (p=0.91) | 0.00 (p=1.00) | -0.11 (p=0.62) | -0.04 (p=0.74) | 0.21 (p=0.08) | 0.02 (p=0.91) |
| **2** | 0.08 (p=0.64) | 1.00 (p=1.00) | -0.50 (p=0.67) | -0.06 (p=0.58) | -0.35 (p<10⁻³) | -0.36 (p<10⁻³) | -0.16 (p=0.27) | 0.06 (p=0.65) | -0.16 (p=0.24) |
| **3** | -0.05 (p=0.81) | -0.55 (p=0.16) | 0.36 (p=0.02) | -0.15 (p=0.25) | -0.30 (p=0.02) | -0.01 (p=0.96) | 0.12 (p=0.29) | -0.01 (p=0.94) | -0.12 (p=0.37) |
| **4** | 0.35 (p=0.01) | -0.03 (p=0.83) | 0.01 (p=0.93) | 0.07 (p=0.58) | 0.15 (p=0.26) | -0.07 (p=0.55) | 0.23 (p=0.03) | 0.07 (p=0.54) | -0.13 (p=0.29) |
| **5** | 0.14 (p=0.23) | 0.02 (p=0.84) | -0.05 (p=0.68) | 0.16 (p=0.13) | 0.19 (p=0.10) | 0.10 (p=0.37) | 0.23 (p=0.03) | 0.20 (p=0.07) | -0.02 (p=0.88) |
| **6** | 0.42 (p<10⁻⁵) | -0.01 (p=0.90) | 0.13 (p=0.20) | 0.28 (p<10⁻³) | 0.22 (p=0.04) | -0.02 (p=0.88) | 0.25 (p=0.02) | 0.01 (p=0.95) | 0.11 (p=0.37) |
| **7** | 0.01 (p=0.89) | 0.16 (p=0.11) | 0.13 (p=0.19) | 0.57 (p<10⁻⁹) | 0.36 (p<10⁻⁴) | 0.14 (p=0.19) | 0.50 (p<10⁻⁷) | 0.51 (p<10⁻⁷) | -0.09 (p=0.45) |
| **8** | 0.11 (p=0.34) | 0.03 (p=0.78) | 0.13 (p=0.22) | 0.52 (p<10⁻⁷) | 0.10 (p=0.39) | -0.03 (p=0.82) | 0.27 (p=0.01) | 0.62 (p<10⁻¹⁰) | -0.18 (p=0.18) |
| **9** | 0.09 (p=0.45) | 0.02 (p=0.89) | -0.06 (p=0.58) | 0.04 (p=0.77) | -0.11 (p=0.37) | -0.11 (p=0.33) | 0.08 (p=0.46) | 0.14 (p=0.21) | -0.35 (p<10⁻³) |
| **10** | 0.08 (p=0.56) | -0.13 (p=0.38) | -0.11 (p=0.43) | -0.05 (p=0.73) | -0.17 (p=0.16) | -0.14 (p=0.25) | -0.08 (p=0.55) | 0.05 (p=0.67) | -0.30 (p=0.02) |
| **11** | 0.19 (p=0.35) | NA | 0.21 (p=0.35) | 0.02 (p=0.87) | -0.17 (p=0.16) | -0.07 (p=0.58) | -0.15 (p=0.19) | -0.10 (p=0.42) | -0.26 (p=0.06) |
| **12** | -0.06 (p=0.79) | NA | -0.02 (p=0.94) | -0.00 (p=0.98) | -0.13 (p=0.29) | -0.33 (p=0.08) | -0.12 (p=0.40) | -0.02 (p=0.87) | -0.00 (p=0.99) |

1. **Precipitation**

|  | **YAK** | **TAY** | **CAN** | **FIN** | **SWE** | **NOR** | **ALT** | **PAK** | **LOT** |
| --- | --- | --- | --- | --- | --- | --- | --- | --- | --- |
| **1** | -0.15 (p=0.28) | -0.12 (p=0.37) | 0.04 (p=0.79) | -0.07 (p=0.47) | 0.08 (p=0.41) | 0.03 (p=0.79) | -0.08 (p=0.41) | 0.10 (p=0.31) | -0.08 (p=0.44) |
| **2** | -0.03 (p=0.85) | 0.04 (p=0.76) | -0.18 (p=0.18) | 0.02 (p=0.86) | 0.04 (p=0.71) | 0.08 (p=0.43) | 0.06 (p=0.49) | -0.10 (p=0.33) | -0.24 (p=0.02) |
| **3** | -0.04 (p=0.78) | -0.01 (p=0.94) | -0.03 (p=0.81) | 0.18 (p=0.07) | -0.05 (p=0.59) | 0.20 (p=0.04) | 0.08 (p=0.39) | -0.12 (p=0.22) | 0.10 (p=0.32) |
| **4** | -0.07 (p=0.60) | -0.15 (p=0.27) | 0.02 (p=0.89) | 0.06 (p=0.57) | -0.10 (p=0.32) | 0.13 (p=0.21) | 0.13 (p=0.17) | -0.13 (p=0.21) | 0.05 (p=0.60) |
| **5** | 0.05 (p=0.70) | -0.11 (p=0.45) | -0.01 (p=0.95) | -0.02 (p=0.81) | 0.06 (p=0.55) | 0.07 (p=0.49) | -0.03 (p=0.75) | -0.17 (p=0.10) | -0.03 (p=0.73) |
| **6** | 0.11 (p=0.41) | 0.03 (p=0.84) | 0.16 (p=0.26) | -0.24 (p=0.02) | -0.07 (p=0.45) | 0.09 (p=0.35) | -0.10 (p=0.27) | -0.13 (p=0.19) | -0.08 (p=0.43) |
| **7** | -0.26 (p=0.07) | -0.42 (p<10⁻³) | -0.05 (p=0.69) | -0.33 (p<10⁻⁴) | -0.16 (p=0.10) | -0.00 (p=0.98) | -0.27 (p<10⁻³) | -0.09 (p=0.36) | -0.46 (p<10⁻⁷) |
| **8** | 0.03 (p=0.85) | -0.14 (p=0.30) | -0.03 (p=0.84) | -0.26 (p<10⁻³) | -0.12 (p=0.21) | 0.16 (p=0.10) | -0.03 (p=0.73) | 0.14 (p=0.16) | -0.31 (p<10⁻³) |
| **9** | -0.17 (p=0.22) | 0.29 (p=0.03) | -0.15 (p=0.27) | 0.03 (p=0.76) | 0.04 (p=0.68) | 0.01 (p=0.94) | -0.06 (p=0.56) | 0.01 (p=0.90) | -0.07 (p=0.47) |
| **10** | -0.12 (p=0.40) | -0.23 (p=0.09) | 0.24 (p=0.07) | -0.19 (p=0.06) | -0.08 (p=0.40) | 0.01 (p=0.94) | 0.14 (p=0.12) | -0.16 (p=0.11) | 0.11 (p=0.29) |
| **11** | -0.23 (p=0.10) | -0.01 (p=0.97) | 0.21 (p=0.12) | 0.03 (p=0.78) | 0.08 (p=0.41) | -0.09 (p=0.37) | 0.12 (p=0.21) | -0.16 (p=0.12) | -0.11 (p=0.29) |
| **12** | 0.11 (p=0.44) | -0.03 (p=0.85) | -0.01 (p=0.95) | -0.15 (p=0.12) | -0.04 (p=0.69) | -0.20 (p=0.04) | -0.15 (p=0.11) | 0.01 (p=0.89) | 0.00 (p=0.99) |

1. **Air temperature**

|  | **YAK** | **TAY** | **CAN** | **FIN** | **SWE** | **NOR** | **ALT** | **PAK** | **LOT** |
| --- | --- | --- | --- | --- | --- | --- | --- | --- | --- |
| **1** | -0.07 (p=0.47) | 0.00 (p=1.00) | 0.03 (p=0.75) | 0.15 (p=0.13) | 0.16 (p=0.11) | 0.13 (p=0.19) | 0.05 (p=0.58) | 0.02 (p=0.88) | 0.16 (p=0.12) |
| **2** | 0.13 (p=0.15) | -0.15 (p=0.10) | 0.18 (p=0.07) | -0.19 (p=0.06) | -0.01 (p=0.92) | 0.12 (p=0.23) | 0.10 (p=0.30) | 0.10 (p=0.34) | 0.00 (p=0.97) |
| **3** | -0.07 (p=0.45) | -0.15 (p=0.10) | -0.03 (p=0.75) | 0.14 (p=0.16) | 0.08 (p=0.39) | 0.15 (p=0.13) | 0.06 (p=0.50) | -0.14 (p=0.17) | 0.16 (p=0.11) |
| **4** | -0.00 (p=0.98) | 0.02 (p=0.83) | 0.08 (p=0.42) | 0.08 (p=0.40) | 0.10 (p=0.30) | 0.07 (p=0.51) | 0.18 (p=0.05) | -0.02 (p=0.87) | 0.05 (p=0.64) |
| **5** | -0.05 (p=0.58) | -0.02 (p=0.86) | 0.11 (p=0.26) | 0.11 (p=0.27) | 0.07 (p=0.50) | -0.02 (p=0.87) | 0.16 (p=0.10) | 0.08 (p=0.45) | 0.14 (p=0.16) |
| **6** | -0.03 (p=0.78) | 0.16 (p=0.09) | 0.33 (p<10⁻⁴) | 0.33 (p<10⁻⁴) | 0.18 (p=0.07) | 0.04 (p=0.70) | 0.20 (p=0.04) | 0.25 (p=0.02) | -0.06 (p=0.55) |
| **7** | 0.26 (p<10⁻³) | 0.23 (p=0.01) | 0.18 (p=0.07) | 0.48 (p<10⁻⁷) | 0.40 (p<10⁻⁵) | 0.21 (p=0.05) | 0.37 (p<10⁻⁵) | 0.29 (p<10⁻³) | 0.47 (p<10⁻⁶) |
| **8** | 0.01 (p=0.94) | 0.17 (p=0.07) | 0.02 (p=0.83) | 0.57 (p<10⁻¹⁰) | 0.25 (p=0.01) | 0.15 (p=0.13) | 0.35 (p<10⁻⁴) | 0.05 (p=0.64) | 0.61 (p<10⁻¹¹) |
| **9** | 0.14 (p=0.15) | -0.02 (p=0.81) | 0.10 (p=0.32) | 0.06 (p=0.59) | -0.06 (p=0.58) | -0.08 (p=0.45) | 0.16 (p=0.09) | -0.19 (p=0.08) | 0.12 (p=0.23) |
| **10** | -0.01 (p=0.93) | -0.05 (p=0.60) | -0.01 (p=0.95) | 0.00 (p=0.99) | -0.05 (p=0.65) | -0.06 (p=0.57) | 0.11 (p=0.27) | -0.13 (p=0.24) | 0.09 (p=0.37) |
| **11** | 0.06 (p=0.54) | -0.02 (p=0.82) | 0.05 (p=0.63) | -0.08 (p=0.44) | -0.06 (p=0.57) | -0.10 (p=0.34) | 0.14 (p=0.13) | -0.10 (p=0.37) | -0.15 (p=0.14) |
| **12** | -0.12 (p=0.19) | -0.10 (p=0.28) | 0.30 (p<10⁻³) | -0.01 (p=0.89) | 0.09 (p=0.37) | -0.01 (p=0.96) | 0.04 (p=0.66) | 0.11 (p=0.28) | 0.12 (p=0.25) |

**e) Relative humidity**

|  | **YAK** | **TAY** | **CAN** | **FIN** | **SWE** | **NOR** | **ALT** | **PAK** | **LOT** |
| --- | --- | --- | --- | --- | --- | --- | --- | --- | --- |
| **1** | NA | 0.59 (p=0.16) | 0.01 (p=0.96) | 0.09 (p=0.43) | 0.20 (p=0.09) | 0.04 (p=0.83) | 0.02 (p=0.88) | 0.03 (p=0.76) | -0.07 (p=0.46) |
| **2** | 0.09 (p=0.57) | 0.47 (p=0.53) | 0.09 (p=0.38) | 0.10 (p=0.42) | 0.30 (p=0.01) | 0.35 (p<10⁻³) | 0.06 (p=0.58) | -0.01 (p=0.95) | -0.00 (p=0.98) |
| **3** | -0.22 (p=0.12) | 0.03 (p=0.93) | -0.06 (p=0.59) | 0.08 (p=0.42) | 0.28 (p<10⁻³) | -0.02 (p=0.82) | -0.20 (p=0.03) | -0.01 (p=0.95) | 0.13 (p=0.20) |
| **4** | -0.19 (p=0.05) | 0.05 (p=0.64) | -0.29 (p<10⁻³) | -0.05 (p=0.64) | -0.03 (p=0.77) | 0.06 (p=0.56) | -0.18 (p=0.05) | 0.03 (p=0.79) | -0.01 (p=0.89) |
| **5** | -0.17 (p=0.07) | 0.04 (p=0.66) | -0.10 (p=0.31) | -0.24 (p=0.02) | -0.15 (p=0.13) | -0.28 (p<10⁻³) | -0.17 (p=0.07) | 0.04 (p=0.70) | -0.15 (p=0.13) |
| **6** | -0.17 (p=0.06) | -0.06 (p=0.48) | -0.14 (p=0.14) | -0.21 (p=0.04) | -0.18 (p=0.07) | -0.11 (p=0.25) | -0.15 (p=0.11) | 0.20 (p=0.05) | -0.12 (p=0.23) |
| **7** | -0.04 (p=0.65) | -0.10 (p=0.29) | -0.03 (p=0.75) | -0.35 (p<10⁻⁴) | 0.00 (p=0.98) | -0.04 (p=0.70) | -0.26 (p<10⁻³) | 0.28 (p<10⁻³) | -0.31 (p<10⁻³) |
| **8** | 0.02 (p=0.84) | -0.23 (p<10⁻³) | -0.09 (p=0.35) | -0.28 (p<10⁻³) | 0.17 (p=0.08) | 0.04 (p=0.66) | -0.08 (p=0.39) | 0.32 (p<10⁻³) | -0.41 (p<10⁻⁵) |
| **9** | 0.18 (p=0.06) | 0.07 (p=0.46) | -0.09 (p=0.39) | -0.04 (p=0.72) | 0.08 (p=0.40) | 0.08 (p=0.46) | -0.16 (p=0.08) | 0.41 (p<10⁻⁵) | -0.13 (p=0.20) |
| **10** | -0.16 (p=0.46) | -0.09 (p=0.74) | -0.07 (p=0.48) | -0.06 (p=0.54) | 0.06 (p=0.57) | 0.07 (p=0.49) | 0.06 (p=0.52) | 0.34 (p<10⁻⁴) | 0.03 (p=0.78) |
| **11** | 0.05 (p=0.80) | 0.11 (p=0.61) | -0.01 (p=0.93) | 0.08 (p=0.50) | 0.00 (p=0.98) | 0.08 (p=0.44) | 0.13 (p=0.18) | 0.24 (p=0.02) | -0.02 (p=0.85) |
| **12** | -0.00 (p=0.98) | -0.05 (p=0.84) | 0.14 (p=0.17) | -0.02 (p=0.89) | 0.31 (p<10⁻³) | 0.29 (p=0.04) | -0.11 (p=0.36) | 0.25 (p=0.01) | 0.03 (p=0.75) |

1. **Vapor pressure deficit**

|  | **YAK** | **TAY** | **CAN** | **FIN** | **SWE** | **NOR** | **ALT** | **PAK** | **LOT** |
| --- | --- | --- | --- | --- | --- | --- | --- | --- | --- |
| **1** | 0.01 (p=0.95) | 0.27 (p=0.05) | 0.12 (p=0.22) | 0.17 (p=0.09) | -0.12 (p=0.21) | 0.07 (p=0.48) | -0.04 (p=0.70) | -0.05 (p=0.65) | 0.20 (p=0.04) |
| **2** | 0.31 (p=0.03) | 0.15 (p=0.27) | 0.06 (p=0.54) | -0.12 (p=0.24) | -0.18 (p=0.07) | 0.03 (p=0.75) | -0.02 (p=0.80) | 0.06 (p=0.54) | -0.05 (p=0.58) |
| **3** | 0.11 (p=0.45) | -0.15 (p=0.27) | 0.03 (p=0.74) | -0.04 (p=0.67) | -0.22 (p=0.02) | 0.03 (p=0.80) | 0.16 (p=0.08) | -0.07 (p=0.48) | -0.02 (p=0.88) |
| **4** | 0.31 (p=0.03) | 0.08 (p=0.56) | 0.34 (p<10⁻⁴) | 0.10 (p=0.31) | 0.07 (p=0.46) | -0.05 (p=0.64) | 0.31 (p<10⁻⁴) | -0.03 (p=0.78) | 0.02 (p=0.81) |
| **5** | -0.04 (p=0.80) | -0.10 (p=0.46) | 0.15 (p=0.12) | 0.22 (p=0.02) | 0.13 (p=0.19) | 0.18 (p=0.07) | 0.25 (p<10⁻³) | -0.01 (p=0.96) | 0.19 (p=0.05) |
| **6** | 0.07 (p=0.61) | 0.21 (p=0.13) | 0.30 (p<10⁻³) | 0.30 (p<10⁻³) | 0.22 (p=0.02) | 0.08 (p=0.40) | 0.21 (p=0.03) | -0.07 (p=0.46) | 0.07 (p=0.48) |
| **7** | 0.52 (p<10⁻⁴) | 0.48 (p<10⁻⁴) | 0.12 (p=0.22) | 0.50 (p<10⁻⁸) | 0.21 (p=0.03) | 0.10 (p=0.32) | 0.42 (p<10⁻⁶) | -0.14 (p=0.16) | 0.44 (p<10⁻⁶) |
| **8** | 0.32 (p=0.02) | 0.25 (p=0.07) | 0.06 (p=0.55) | 0.42 (p<10⁻⁵) | -0.03 (p=0.78) | 0.02 (p=0.87) | 0.21 (p=0.03) | -0.28 (p<10⁻³) | 0.54 (p<10⁻⁹) |
| **9** | 0.18 (p=0.22) | 0.08 (p=0.58) | 0.12 (p=0.22) | 0.05 (p=0.60) | -0.12 (p=0.24) | -0.11 (p=0.28) | 0.21 (p=0.03) | -0.43 (p<10⁻⁵) | 0.15 (p=0.13) |
| **10** | 0.28 (p=0.05) | 0.11 (p=0.42) | 0.08 (p=0.40) | 0.06 (p=0.56) | -0.11 (p=0.25) | -0.09 (p=0.37) | -0.00 (p=0.99) | -0.36 (p<10⁻⁴) | 0.02 (p=0.87) |
| **11** | 0.18 (p=0.21) | 0.11 (p=0.44) | 0.10 (p=0.29) | -0.18 (p=0.07) | -0.23 (p=0.02) | -0.08 (p=0.42) | -0.23 (p=0.01) | -0.31 (p<10⁻³) | -0.09 (p=0.35) |
| **12** | 0.12 (p=0.43) | -0.09 (p=0.52) | -0.08 (p=0.43) | -0.02 (p=0.84) | -0.20 (p=0.04) | -0.08 (p=0.41) | -0.21 (p=0.02) | -0.25 (p=0.01) | 0.00 (p=1.00) |

**Table S5.** Pearson correlation coefficients and significant *P-values* *<0.001* level (bold values) between de-trended intrinsic water use efficiency iWUE versus CO2 concentration in the atmosphere over the pre-industrial (CE 1000-1899) and industrial (CE 1900-1998) periods.

| **Period** | **Pearson correlation, p-value** | **iWUE versus CO2 concentration** | | | | | | | | |
| --- | --- | --- | --- | --- | --- | --- | --- | --- | --- | --- |
| **YAK** | **TAY** | **CAN** | **FIN** | **SWE** | **NOR** | **ALT** | **PAK** | **LOT** |
| 1000-1899 | r | **0.1** | **0.3** | **0.1** | **0.3** | **0.2** | **0.2** | **0.4** | **0.3** | **0.3** |
| *p-value* | *0.00* | *0.00* | *0.01* | *0.00* | *0.00* | *0.00* | *0.00* | *0.00* | *0.00* |
| 1900-1998 | r | **0.3** | **0.2** | **0.9** | **0.2** | **0.7** | **0.7** | **0.8** | **0.6** | **0.6** |
| *p-value* | *0.00* | *0.10* | *0.00* | *0.01* | *0.00* | *0.00* | *0.00* | *0.00* | *0.00* |
